# Supplementary material for: Nitrogen and phosphorus recycling mediated by copepods in Western Tropical South Pacific
Source: Copernicus journal article supplement (doi:10.5194/bg-2017-563), 2018-01-25
Supplement: Supplementary file [file bg-2017-563-AC2-supplement.pdf]

# Nitrogen and phosphorus recycling mediated by copepods and response of bacterioplankton community from three contrasting areas in the Western Tropical South Pacific (20°S)

Valentina Valdés<sup>1,2</sup>, François Carlotti<sup>3</sup>, Ruben Escribano<sup>4, 5</sup>, Katty Donoso<sup>3</sup>, Marc Pagano<sup>3</sup>, Veronica Molina<sup>6</sup> and Camila Fernandez<sup>2, 7, 8</sup>

<sup>1</sup>Programa de Doctorado en Oceanografía, Departamento de Oceanografía, Facultad de Ciencias Naturales y Oceanográficas, Universidad de Concepción, Concepción, Chile.

<sup>2</sup>UPMC Univ Paris 06, UMR 7621, Laboratoire d'Océanographie Microbienne, Observatoire Océanologique, Sorbonne Universités, Banyuls sur Mer F-66650, France.

<sup>3</sup>Aix-Marseille Univ, Université de Toulon, CNRS, IRD, OSU PYTHEAS, Mediterranean Institute of Oceanography MIO, UM 110, 13288, Marseille, Cedex 09, France.

<sup>4</sup>Departamento de Oceanografía, Universidad de Concepción, Concepción, Chile.

<sup>5</sup>Instituto Milenio de Oceanografía, Universidad de Concepción, Concepción, Chile.

<sup>6</sup>Departamento de Biología and Programa de Biodiversidad, Facultad de Ciencias Naturales y Exactas, Universidad de Playa Ancha, Playa Ancha, Valparaíso, Chile.

<sup>7</sup>FONDAP INCAR center (15110027), and PFB-31 COPAS Sur Austral program; Departamento de Oceanografía, Universidad de Concepción, Concepción, Chile.

<sup>8</sup>Centro FONDAP de Investigación en Dinámica de Ecosistemas Marinos de Altas Latitudes (IDEAL), Valdivia, Chile.

Correspondence to: Valentina Valdés (vvaldesc@udec.cl)

## Supplementary information

**Table S1:** Epipelagic copepod composition used at each experiment.

| Specie                        | LD A | LD B | LD C |
|-------------------------------|------|------|------|
| <i>Haloptilus longicornis</i> | X    |      |      |
| <i>Pleuromamma sp</i>         | X    | X    | X    |
| <i>Acartia sp</i>             | X    |      |      |
| <i>Saphirina sp</i>           | X    |      |      |
| <i>Temora sp</i>              |      | X    |      |
| <i>Miracia efferata</i>       |      | X    |      |
| <i>Microsetella sp</i>        | X    | X    |      |
| <i>Copilia sp</i>             |      | X    | X    |
| <i>Clausocalanus sp</i>       | X    | X    | X    |
| <i>Lucicutia sp</i>           |      |      | X    |

**Table S2:** ANOVA followed by the Tukey's Honest Significant Difference (HSD), statistical comparison was performed on nutrients concentration in treatment with copepods and control. The mean of HSD is recorded at 95% confidence level with its associated P value for this comparison. Significant P values are bolded. NA indicates that no significant difference was found between treatments. No HSD test was performed for 'T0' (15 min observation), because of too few data.

| LD A                               | T0                                   | T1                                | T2                               | T3                                    | T4                                |
|------------------------------------|--------------------------------------|-----------------------------------|----------------------------------|---------------------------------------|-----------------------------------|
| <b>NH<sub>4</sub><sup>+</sup></b>  |                                      |                                   |                                  |                                       |                                   |
| Copepod-Control                    | <b>HSD=0.1</b><br><b>p&lt;0.0001</b> | <b>HSD=0.08</b><br><b>p=0.001</b> | <b>HSD=0.06</b><br><b>p=0.02</b> | <b>HSD=0.08</b><br><b>p&lt;0.0001</b> | HSD=0.003<br>p=0.9                |
| <b>NO<sub>2</sub><sup>-</sup></b>  |                                      |                                   |                                  |                                       |                                   |
| Copepod-Control                    | HSD=-0.01<br>p=0.99                  | HSD=0.006<br>p=0.98               | HSD=-0.001<br>p=1                | HSD=0.013<br>p=0.4                    | HSD=-0.008<br>p=0.93              |
| <b>NO<sub>3</sub><sup>-</sup></b>  |                                      |                                   |                                  |                                       |                                   |
| Copepod-Control                    | NA                                   | NA                                | NA                               | NA                                    | NA                                |
| <b>PO<sub>4</sub><sup>3-</sup></b> |                                      |                                   |                                  |                                       |                                   |
| Copepod-Control                    | HSD=0.003<br>p=1                     | HSD=0.05<br>p=0.72                | HSD=0.09<br>p=0.1                | HSD=0.006<br>p=0.99                   | HSD=-0.01<br>p=0.99               |
| <b>DON</b>                         |                                      |                                   |                                  |                                       |                                   |
| Copepod-Control                    | HSD=0.03<br>p=0.99                   | <b>HSD=0.28</b><br><b>p=0.01</b>  | HSD=0.1<br>p=0.87                | HSD=0.04<br>p=0.99                    | HSD=0.001<br>p=1                  |
| <b>DOP</b>                         |                                      |                                   |                                  |                                       |                                   |
| Copepod-Control                    | NA                                   | NA                                | NA                               | NA                                    | NA                                |
| <b>Bacterioplankton</b>            |                                      |                                   |                                  |                                       |                                   |
| Copepod-Control                    | HSD=2.64<br>p=1                      | HSD=8.63<br>p=0.99                | HSD=6.92<br>p=0.99               | HSD=-33.6<br>p=0.55                   | HSD=17.82<br>p=0.97               |
| <b>LD B</b>                        |                                      |                                   |                                  |                                       |                                   |
| <b>NH<sub>4</sub><sup>+</sup></b>  |                                      |                                   |                                  |                                       |                                   |
| Copepod-Control                    | HSD=0.07<br>p=0.1                    | HSD=0.02<br>p=0.99                | HSD=0.01<br>p=0.99               | <b>HSD=0.16</b><br><b>P&lt;0.001</b>  | <b>HSD=0.09</b><br><b>p=0.006</b> |
| <b>NO<sub>2</sub><sup>-</sup></b>  |                                      |                                   |                                  |                                       |                                   |
| Copepod-Control                    | NA                                   | NA                                | NA                               | NA                                    | NA                                |
| <b>NO<sub>3</sub><sup>-</sup></b>  |                                      |                                   |                                  |                                       |                                   |
| Copepod-Control                    | HSD=-0.05<br>p=0.99                  | HSD=0.003<br>p=0.99               | <b>HSD=0.37</b><br><b>p=0.02</b> | HSD=-0.002<br>p=1                     | HSD=0.13<br>p=0.89                |
| <b>PO<sub>4</sub><sup>3-</sup></b> |                                      |                                   |                                  |                                       |                                   |
| Copepod-Control                    | NA                                   | NA                                | NA                               | NA                                    | NA                                |
| <b>DON</b>                         |                                      |                                   |                                  |                                       |                                   |
| Copepod-Control                    | NA                                   | NA                                | NA                               | NA                                    | NA                                |
| <b>DOP</b>                         |                                      |                                   |                                  |                                       |                                   |
| Copepod-Control                    | NA                                   | NA                                | NA                               | NA                                    | NA                                |
| <b>Bacterioplankton</b>            |                                      |                                   |                                  |                                       |                                   |
| Copepod-Control                    | HSD=42.7                             | HSD=57.9                          | <b>HSD=-307</b>                  | HSD=-16.8                             | HSD=-61.4                         |

|                                    |                                   |                    |                                  |                                       |                                       |
|------------------------------------|-----------------------------------|--------------------|----------------------------------|---------------------------------------|---------------------------------------|
|                                    | p=0.99                            | p=0.97             | <b>p=0.001</b>                   | p=0.99                                | p=0.96                                |
| <b>LD C</b>                        |                                   |                    |                                  |                                       |                                       |
| <b>NH<sub>4</sub><sup>+</sup></b>  |                                   |                    |                                  |                                       |                                       |
| Copepod-Control                    | HSD=0.06<br>p=0.76                | HSD=0.09<br>p=0.22 | <b>HSD=0.14</b><br><b>p=0.02</b> | <b>HSD=0.20</b><br><b>p&lt;0.0001</b> | <b>HSD=0.29</b><br><b>p&lt;0.0001</b> |
| <b>NO<sub>2</sub><sup>-</sup></b>  |                                   |                    |                                  |                                       |                                       |
| Copepod-Control                    | NA                                | NA                 | NA                               | NA                                    | NA                                    |
| <b>NO<sub>3</sub><sup>-</sup></b>  |                                   |                    |                                  |                                       |                                       |
| Copepod-Control                    | HSD=0.21<br>p=0.66                | HSD=0.09<br>p=0.99 | HSD=0.004<br>p=1                 | HSD=0.35<br>p=0.10                    | <b>HSD=0.48</b><br><b>p=0.009</b>     |
| <b>PO<sub>4</sub><sup>3-</sup></b> |                                   |                    |                                  |                                       |                                       |
| Copepod-Control                    | NA                                | NA                 | NA                               | NA                                    | NA                                    |
| <b>DON</b>                         |                                   |                    |                                  |                                       |                                       |
| Copepod-Control                    | <b>HSD=0.21</b><br><b>p=0.006</b> | HSD=0.07<br>p=0.82 | HSD=0.10<br>p=0.50               | HSD=0.15<br>p=0.07                    | HSD=0.02<br>p=0.99                    |
| <b>DOP</b>                         |                                   |                    |                                  |                                       |                                       |
| Copepod-Control                    | NA                                | NA                 | NA                               | NA                                    | NA                                    |
| <b>Bacterioplankton</b>            |                                   |                    |                                  |                                       |                                       |
| Copepod-Control                    | HSD=-25.2<br>p=0.99               | HSD=-101<br>p=0.56 | HSD=5.96<br>p=1                  | HSD=-80.1<br>p=0.81                   | HSD=-71.4<br>p=0.89                   |

**Table S3:** Similarity percentage analysis (SIMPER) showing the contribution and taxonomic affiliation of OTUs explaining 60% of the dissimilarity between treatments through time for present and active bacterial community in both sampling date.

| LD A               |          |                                            |         |                  |
|--------------------|----------|--------------------------------------------|---------|------------------|
| Factors            | Av. Diss | Phyla/Class                                | Diss/SD | Contribution (%) |
| Copepods & Control | 15.84    | Alteromonadales                            | 0.69    | 7.15             |
|                    |          | Rhodobacterales                            | 1.49    | 5.62             |
|                    |          | SAR11 clade                                | 1.59    | 4.15             |
|                    |          | Vibrionales                                | 1.27    | 3.65             |
|                    |          | Derived from SAR202 clade                  | 1.13    | 3.23             |
|                    |          | SubsectionIII                              | 1.32    | 3.01             |
|                    |          | SAR324 clade (Marine group B)              | 1.54    | 2.84             |
|                    |          | Flavobacteriales                           | 0.61    | 2.63             |
|                    |          | SubsectionI                                | 1.31    | 2.61             |
|                    |          | Oceanospirillales                          | 0.80    | 2.28             |
|                    |          | Planctomycetales                           | 0.62    | 1.95             |
|                    |          | Derived from PAUC34f                       | 1.18    | 1.57             |
|                    |          | Rhodospirillales                           | 1.33    | 1.56             |
|                    |          | Cellvibrionales                            | 0.75    | 1.49             |
|                    |          | Derived from Subgroup 6                    | 1.23    | 1.43             |
|                    |          | Caulobacterales                            | 1.30    | 1.32             |
|                    |          | Derived from Marinimicrobia (SAR406 clade) | 0.14    | 1.26             |
|                    |          | Phycisphaerales                            | 0.72    | 1.22             |
|                    |          | Derived from Arctic97B-4 marine            | 1.15    | 1.14             |
|                    |          | Rhizobiales                                | 1.39    | 1.09             |
|                    |          | Derived from Poribacteria                  | 1.16    | 1.09             |
|                    |          | Derived from Chloroplast                   | 0.81    | 0.98             |
|                    |          | Pseudomonadales                            | 0.84    | 0.97             |
|                    |          | Sphingobacteriales                         | 1.47    | 0.94             |
|                    |          | Myxococcales                               | 0.87    | 0.89             |
|                    |          | E01-9C-26 marine group                     | 1.35    | 0.86             |
|                    |          | Puniceicoccales                            | 1.35    | 0.86             |
|                    |          | Nitrospinales                              | 0.95    | 0.82             |
|                    |          | Nitrospirales                              | 1.62    | 0.81             |
|                    |          | Cytophagales                               | 0.92    | 0.78             |
| LD B               |          |                                            |         |                  |
| Copepods & Control | 9.50     | Alteromonadales                            | 1.16    | 6.53             |
|                    |          | Caulobacterales                            | 0.58    | 5.47             |
|                    |          | SAR11 clade                                | 1.77    | 5.18             |
|                    |          | Rhodobacterales                            | 0.78    | 3.69             |
|                    |          | SubsectionI                                | 1.88    | 3.32             |
|                    |          | Vibrionales                                | 0.91    | 2.98             |
|                    |          | Pseudomonadales                            | 1.05    | 1.83             |
|                    |          | Oceanospirillales                          | 1.28    | 1.60             |
|                    |          | Cellvibrionales                            | 0.78    | 1.45             |

|                                               |      |      |
|-----------------------------------------------|------|------|
| Derived from Poribacteria                     | 4.13 | 1.44 |
| Derived from ARKICE-90                        | 1.62 | 1.36 |
| SAR324 clade(Marine group B)                  | 1.26 | 1.34 |
| Sphingomonadales                              | 0.25 | 1.30 |
| Desulfobacterales                             | 1.74 | 1.19 |
| Hydrogenophilales                             | 9.87 | 1.15 |
| Acidimicrobiales                              | 1.74 | 1.14 |
| Chlorobiales                                  | 1.37 | 1.14 |
| Campylobacterales                             | 1.44 | 1.13 |
| UnknownOrder                                  | 1.19 | 1.13 |
| Acanthopleuribacterales                       | 1.67 | 1.05 |
| Chromatiales                                  | 1.38 | 1.03 |
| MB11C04 marine group                          | 3.00 | 1.02 |
| Derived from Marinimicrobia<br>(SAR406 clade) | 0.82 | 1.01 |
| Rhodospirillales                              | 0.96 | 0.94 |
| Phycisphaerales                               | 1.41 | 0.93 |
| Kordiimonadales                               | 0.94 | 0.91 |
| NB1-j                                         | 4.36 | 0.90 |
| Bacillales                                    | 1.35 | 0.89 |
| A714019                                       | 1.84 | 0.88 |
| Derived from Chloroplast                      | 1.09 | 0.88 |
| Derived from OPB35 soil group                 | 1.21 | 0.86 |
| Rhizobiales                                   | 1.86 | 0.85 |
| Chlamydiales                                  | 1.40 | 0.85 |
| Derived from TK10                             | 1.02 | 0.83 |
| Puniceococcales                               | 1.22 | 0.83 |
| Bdellovibrionales                             | 1.56 | 0.79 |
| Aeromonadales                                 | 1.09 | 0.79 |

| LD C               |       |                                               |      |      |
|--------------------|-------|-----------------------------------------------|------|------|
| Copepods & Control | 18.37 | Alteromonadales                               | 1.75 | 8.94 |
|                    |       | Vibrionales                                   | 1.24 | 8.66 |
|                    |       | Oceanospirillales                             | 1.46 | 7.92 |
|                    |       | SAR11 clade                                   | 1.20 | 7.61 |
|                    |       | SubsectionI                                   | 1.77 | 4.12 |
|                    |       | Derived from Marinimicrobia<br>(SAR406 clade) | 1.59 | 2.89 |
|                    |       | Caulobacterales                               | 1.11 | 2.87 |
|                    |       | Acidimicrobiales                              | 2.16 | 2.37 |
|                    |       | Rhodospirillales                              | 3.65 | 2.17 |
|                    |       | Rhodobacterales                               | 0.82 | 2.16 |
|                    |       | SAR324 clade (Marine group<br>B)              | 1.54 | 1.77 |
|                    |       | Rhizobiales                                   | 2.05 | 1.70 |
|                    |       | Sphingomonadales                              | 1.97 | 1.16 |
|                    |       | Derived from ML635J-21                        | 1.45 | 1.13 |
|                    |       | Rickettsiales                                 | 1.21 | 1.10 |

|                 |      |      |
|-----------------|------|------|
| Pseudomonadales | 1.68 | 1.04 |
| Rhizobiales     | 1.50 | 1.03 |
| Burkholderiales | 0.95 | 0.99 |
| Micrococcales   | 0.57 | 0.97 |

**Table S4:** Consumption and production rates obtained in the treatment incubated with copepods. The turnover rates were obtained for each compound studied between incubation times and were estimated using an end-point approach. A positive value indicates a net accumulation and negative values indicates a net consumption of nutrient.

| Period of incubation | NH <sub>4</sub> <sup>+</sup><br>(μmol L <sup>-1</sup> h <sup>-1</sup> ) | NO <sub>3</sub> <sup>-</sup><br>(μmol L <sup>-1</sup> h <sup>-1</sup> ) | NO <sub>2</sub><br>(μmol L <sup>-1</sup> h <sup>-1</sup> ) | PO <sub>4</sub> <sup>3-</sup><br>(μmol L <sup>-1</sup> h <sup>-1</sup> ) | DON<br>(μmol L <sup>-1</sup> h <sup>-1</sup> ) | DOP<br>(μmol L <sup>-1</sup> h <sup>-1</sup> ) |                |
|----------------------|-------------------------------------------------------------------------|-------------------------------------------------------------------------|------------------------------------------------------------|--------------------------------------------------------------------------|------------------------------------------------|------------------------------------------------|----------------|
| LD A                 | T <sub>0</sub> -T <sub>1</sub>                                          | 0.004 ± 0.117                                                           | 0.016 ± 0.031                                              | 0.013 ± 0.015                                                            | 0.035 ± 0.049                                  | 4.03 ± 5.02                                    | 0.68 ± 0.84    |
|                      | T <sub>1</sub> -T <sub>2</sub>                                          | -0.003 ± 0.045                                                          | 0.005 ± 0.077                                              | -0.013 ± 0.014                                                           | -0.063 ± 0.129                                 | -3.62 ± 4.82                                   | -0.28 ± 0.54   |
|                      | T <sub>2</sub> -T <sub>3</sub>                                          | 0.028 ± 0.027                                                           | 0.015 ± 0.027                                              | -0.007 ± 0.008                                                           | -0.142 ± 0.035                                 | 0.20 ± 0.04                                    | 0.03 ± 0.20    |
|                      | T <sub>3</sub> -T <sub>4</sub>                                          | -0.053 ± 0.008                                                          | -0.036 ± 0.045                                             | -0.008 ± 0.005                                                           | 0.001 ± 0.001                                  | 0.11 ± 0.12                                    | 0.01 ± 0.01    |
| LDB                  | T <sub>0</sub> -T <sub>0.25</sub>                                       | 0.331 ± 0.132                                                           | 0.067 ± 0.050                                              | -0.002 ± 0.006                                                           | -0.005 ± 0.017                                 | -0.005 ± 0.37                                  | 0.01 ± 0.04    |
|                      | T <sub>0.25</sub> -T <sub>0.5</sub>                                     | -0.015 ± 0.045                                                          |                                                            |                                                                          |                                                |                                                |                |
|                      | T <sub>0.5</sub> -T <sub>1</sub>                                        | -0.095 ± 0.055                                                          | 1.171 ± 0.910                                              | 0.001 ± 0.006                                                            | 0.002 ± 0.029                                  | -1.157 ± 1.429                                 | 0.02 ± 0.03    |
|                      | T <sub>1</sub> -T <sub>2</sub>                                          | 0.027 ± 0.027                                                           | -0.612 ± 0.460                                             | -0.001 ± 0.006                                                           | 0.003 ± 0.014                                  | 0.557 ± 0.206                                  | -0.02 ± 0.04   |
|                      | T <sub>3</sub> -T <sub>4</sub>                                          | 0.031 ± 0.021                                                           | 0.110 ± 0.162                                              | -0.011 ± 0.016                                                           | 0.034 ± 0.054                                  | -0.010 ± 0.117                                 | 0.02 ± 0.02    |
| LD C                 | T <sub>0</sub> -T <sub>0.25</sub>                                       | 0.056 ± 0.202                                                           | 0.019 ± 0.318                                              | 0.011 ± 0.026                                                            | 0.067 ± 0.067                                  | -1.85 ± 1.18                                   | 0.001 ± 0.18   |
|                      | T <sub>0.25</sub> -T <sub>0.5</sub>                                     | 0.043 ± 0.398                                                           |                                                            |                                                                          |                                                |                                                |                |
|                      | T <sub>0.5</sub> -T <sub>1</sub>                                        | 0.117 ± 0.193                                                           | -0.143 ± 0.210                                             | -0.009 ± 0.025                                                           | -0.042 ± 0.075                                 | 0.13 ± 0.84                                    | -0.09 ± 0.16   |
|                      | T <sub>1</sub> -T <sub>2</sub>                                          | 0.061 ± 0.050                                                           | 0.040 ± 0.079                                              | -0.003 ± 0.004                                                           | 0.013 ± 0.012                                  | -0.19 ± 0.29                                   | -0.01 ± 0.02   |
|                      | T <sub>3</sub> -T <sub>4</sub>                                          | 0.036 ± 0.041                                                           | 0.256 ± 0.081                                              | -0.001 ± 0.003                                                           | 0.000 ± 0.005                                  | 0.02 ± 0.13                                    | -0.001 ± 0.004 |

**Table S5:** Consumption and production rates obtained in the control (without copepods). The turnover rates were obtained for each compound studied between incubation times and were estimated using an end-point approach. A positive value indicates a net accumulation and negative values indicates a net consumption of nutrient.

| Period of incubation | NH <sub>4</sub> <sup>+</sup><br>(μmol L <sup>-1</sup> h <sup>-1</sup> ) | NO <sub>3</sub> <sup>-</sup><br>(μmol L <sup>-1</sup> h <sup>-1</sup> ) | NO <sub>2</sub><br>(μmol L <sup>-1</sup> h <sup>-1</sup> ) | PO <sub>4</sub> <sup>3-</sup><br>(μmol L <sup>-1</sup> h <sup>-1</sup> ) | DON<br>(μmol L <sup>-1</sup> h <sup>-1</sup> ) | DOP<br>(μmol L <sup>-1</sup> h <sup>-1</sup> ) |                |
|----------------------|-------------------------------------------------------------------------|-------------------------------------------------------------------------|------------------------------------------------------------|--------------------------------------------------------------------------|------------------------------------------------|------------------------------------------------|----------------|
| LD A                 | T <sub>0</sub> -T <sub>1</sub>                                          | 0.040 ± 0.004                                                           | -0.054 ± 0.114                                             | -0.004 ± 0.002                                                           | -0.061 ± 0.114                                 | -0.01 ± 0.88                                   | 0.073 ± 0.123  |
|                      | T <sub>1</sub> -T <sub>2</sub>                                          | 0.041 ± 0.027                                                           | 0.143 ± 0.036                                              | 0.005 ± 0.001                                                            | -0.140 ± 0.095                                 | -0.60 ± 1.26                                   | 0.142 ± 0.089  |
|                      | T <sub>2</sub> -T <sub>3</sub>                                          | -0.046 ± 0.009                                                          | -0.111 ± 0.111                                             | -0.022 ± 0.001                                                           | -0.023 ± 0.019                                 | 0.55 ± 0.39                                    | 0.036 ± 0.034  |
|                      | T <sub>3</sub> -T <sub>4</sub>                                          | -0.014 ± 0.003                                                          | -0.016 ± 0.038                                             | 0.001 ± 0.009                                                            | 0.008 ± 0.008                                  | 0.32 ± 0.04                                    | -0.009 ± 0.009 |
| LDB                  | T <sub>0</sub> -T <sub>0.5</sub>                                        | 0.143 ± 0.011                                                           | -0.094 ± 0.076                                             | 0.009 ± 0.016                                                            | 0.027 ± 0.038                                  | 0.323 ± 0.207                                  | -0.02 ± 0.08   |
|                      | T <sub>0.5</sub> -T <sub>1</sub>                                        | 0.086 ± 0.032                                                           |                                                            |                                                                          |                                                |                                                |                |
|                      | T <sub>1</sub> -T <sub>2</sub>                                          | -0.121 ± 0.098                                                          | 0.129 ± 0.004                                              | 0.005 ± 0.035                                                            | 0.016 ± 0.136                                  | -0.519 ± 1.322                                 | 0.02 ± 0.06    |
|                      | T <sub>3</sub> -T <sub>4</sub>                                          | -0.109 ± 0.018                                                          | -0.062 ± 0.025                                             | -0.003 ± 0.004                                                           | -0.028 ± 0.040                                 | -0.316 ± 0.593                                 | -0.001 ± 0.09  |
|                      | T <sub>4</sub> -T <sub>5</sub>                                          | 0.103 ± 0.081                                                           | 0.017 ± 0.024                                              | 0.001 ± 0.001                                                            | 0.003 ± 0.004                                  | 0.244 ± 0.267                                  | 0.04 ± 0.01    |
| LD C                 | T <sub>0</sub> -T <sub>0.5</sub>                                        | -0.012 ± 0.057                                                          | -0.581 ± 0.344                                             | -0.001 ± 0.005                                                           | 0.047 ± 0.098                                  | -0.03 ± 1.01                                   | -0.04 ± 0.08   |
|                      | T <sub>0.5</sub> -T <sub>1</sub>                                        | -0.025 ± 0.061                                                          |                                                            |                                                                          |                                                |                                                |                |
|                      | T <sub>1</sub> -T <sub>2</sub>                                          | 0.029 ± 0.021                                                           | 0.027 ± 0.086                                              | -0.009 ± 0.005                                                           | -0.025 ± 0.072                                 | -0.18 ± 0.72                                   | 0.03 ± 0.06    |
|                      | T <sub>3</sub> -T <sub>4</sub>                                          | -0.005 ± 0.016                                                          | 0.394 ± 0.261                                              | 0.005 ± 0.012                                                            | -0.007 ± 0.027                                 | -0.46 ± 0.09                                   | 0.0003 ± 0.03  |
|                      | T <sub>4</sub> -T <sub>5</sub>                                          | -0.009 ± 0.004                                                          | -0.159 ± 0.048                                             | -0.006 ± 0.002                                                           | -0.002 ± 0.003                                 | 0.40 ± 0.15                                    | 0.004 ± 0.01   |



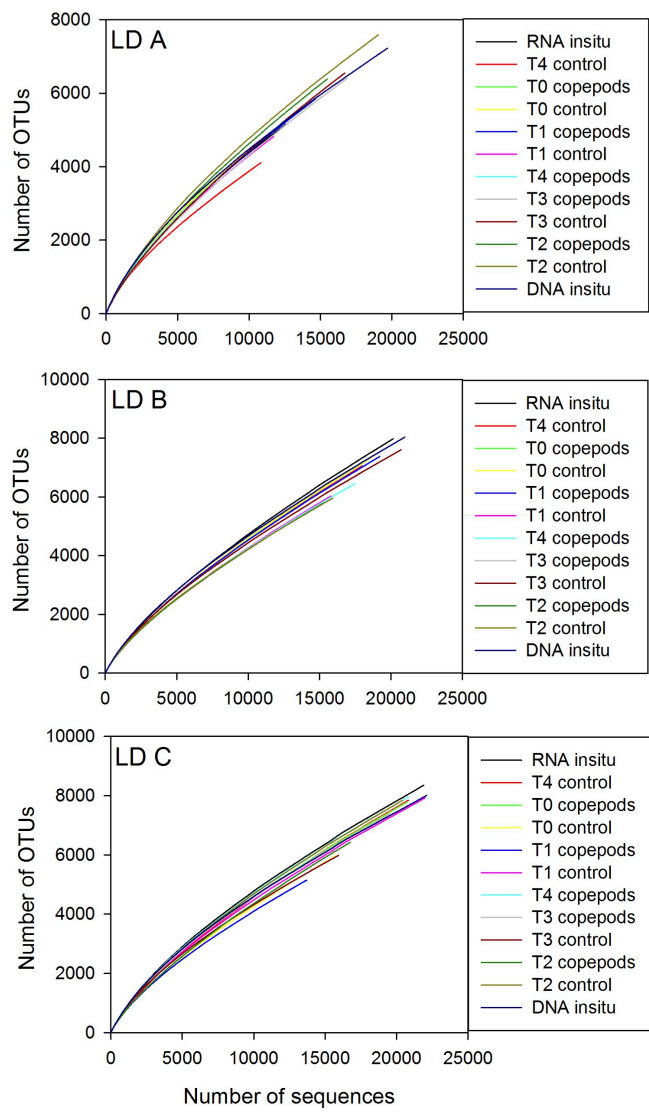

**Figure S1:** Rarefaction curves derived from classified total and active bacteria OTUs detected from the 16S rDNA and rRNA libraries generated from samples collected *in situ* and the following experimental incubation treatment and control.

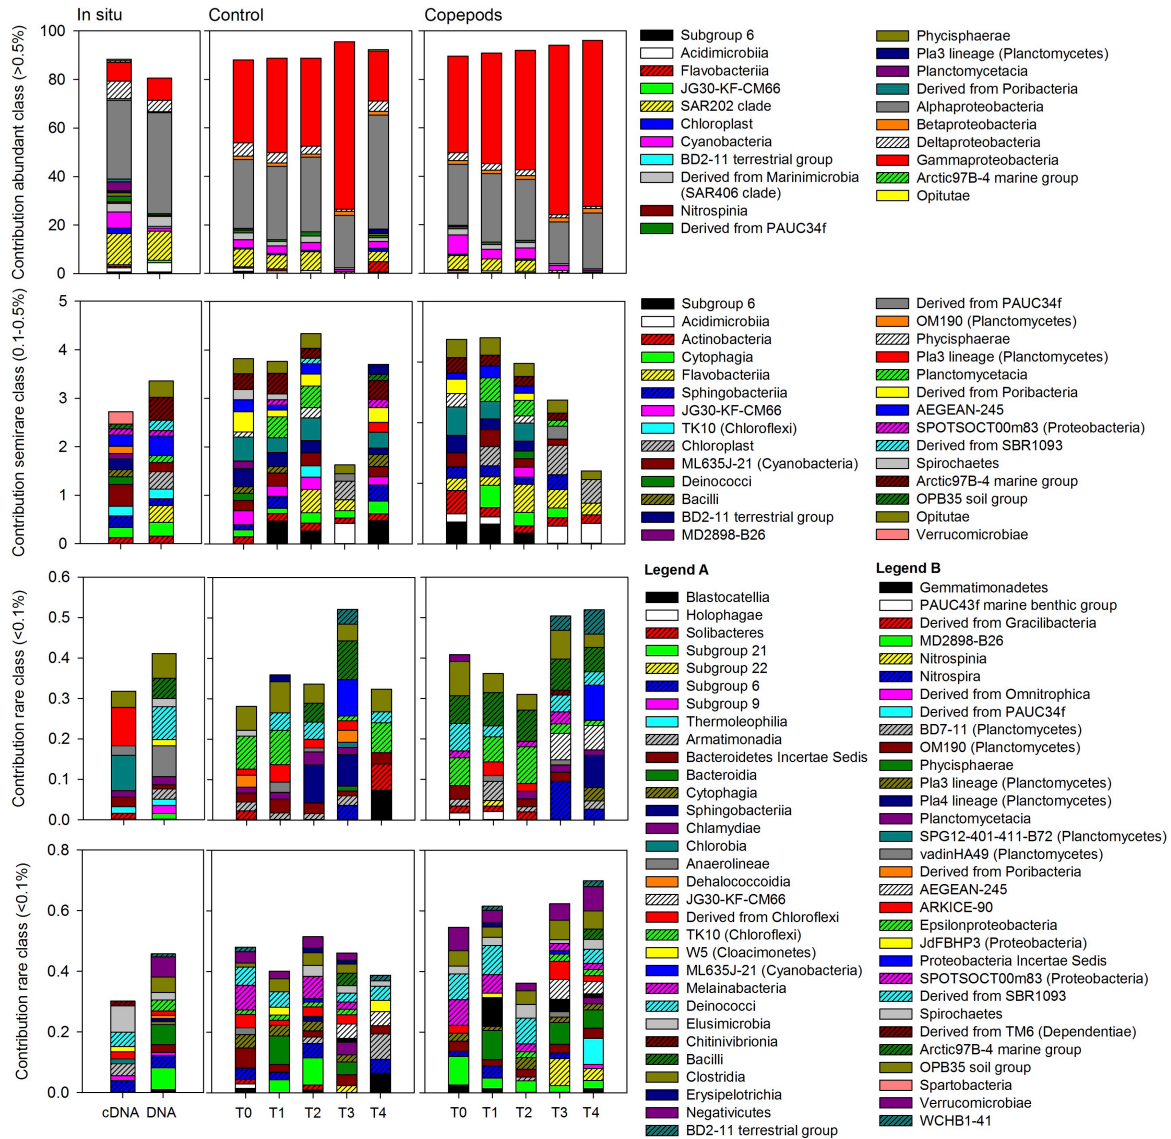

**Figure S2:** Contribution of total and active Classes classified according to their initial *in situ* contribution as abundant, semi-rare and rare in percentages (>0.5%, 0.1–0.5% and <0.1% of libraries, respectively), and their changes through the time of the experiment with copepods and control in LD A station experiment.

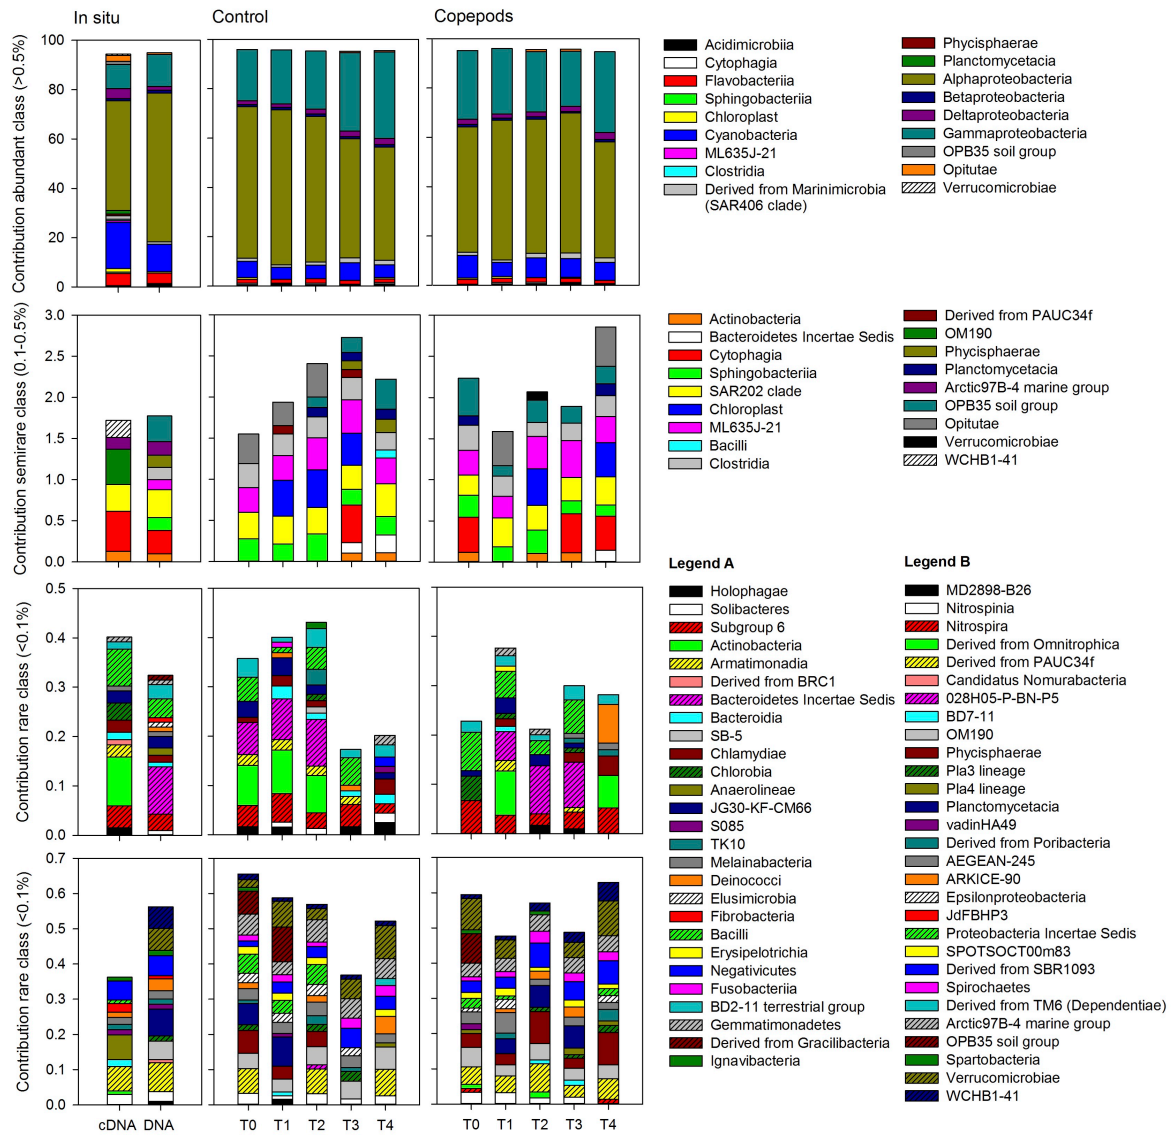

**Figure S3:** Contribution of total and active Classes classified according to their initial *in situ* contribution as abundant, semi-rare and rare in percentages (>0.5%, 0.1–0.5% and <0.1% of libraries, respectively), and their changes through the time of the experiment at the treatment with copepods and control in LD B station experiment.

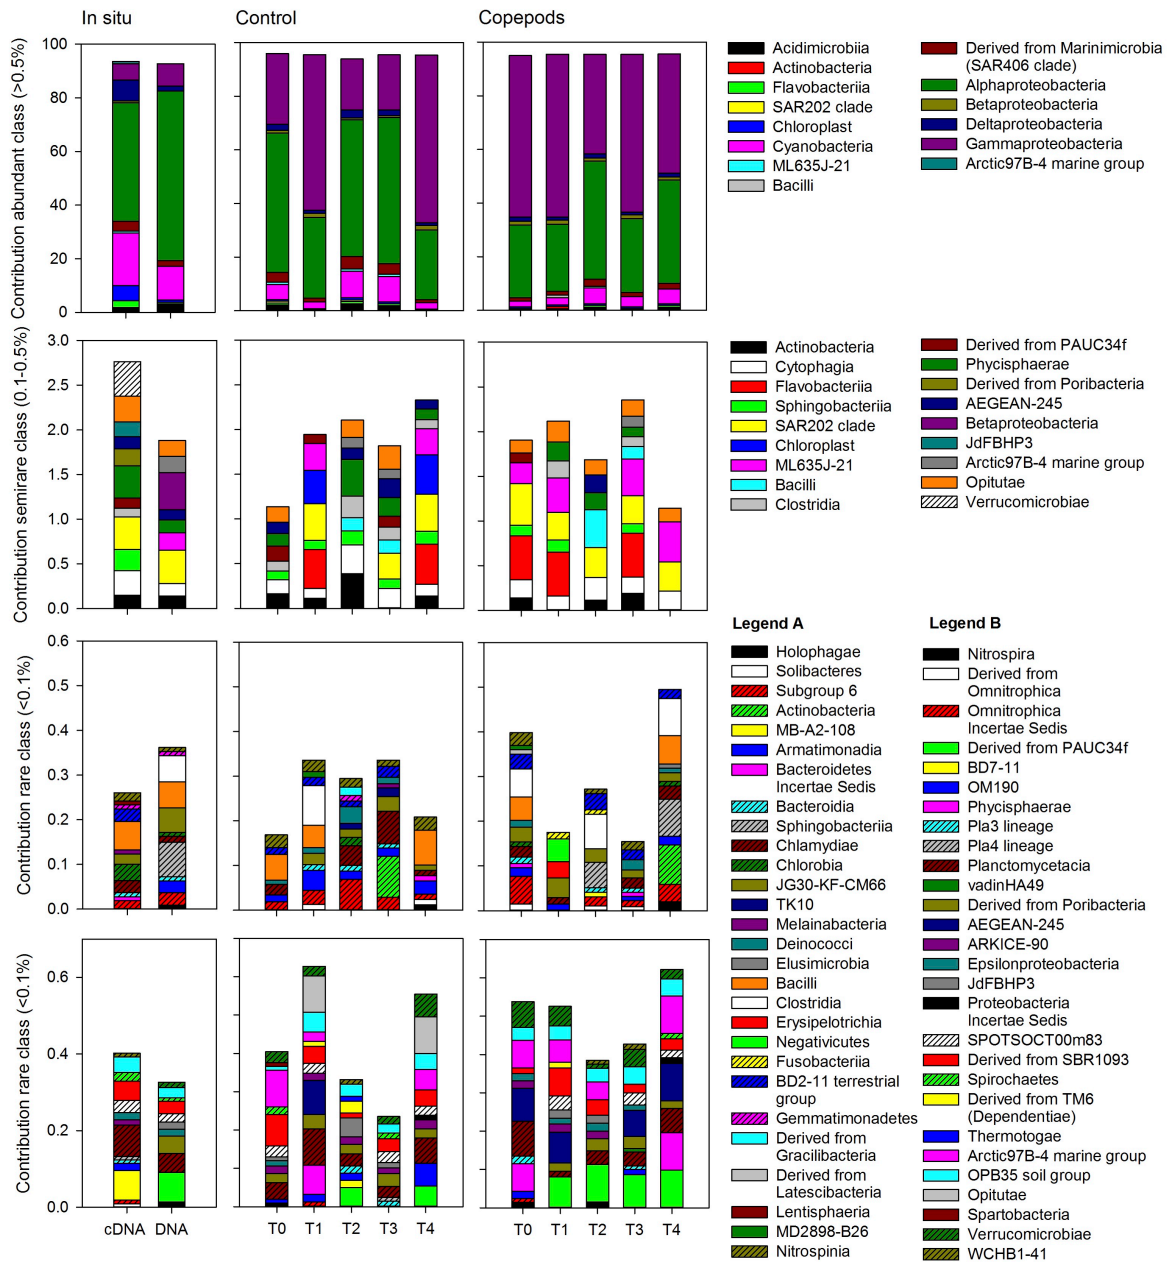

**Figure S4:** Contribution of total and active Classes classified according to their initial *in situ* contribution as abundant, semi-rare and rare in percentages (>0.5%, 0.1–0.5% and <0.1% of libraries, respectively), and their changes through the time of the experiment at the treatment with copepods and control in LD C station experiment.
